# Supplementary material for: Prognostic factors in lumbar spinal stenosis surgery: A prospective study of imaging- and patient-related factors in 109 patients who were operated on by decompression
Source: PubMed Central journal article supplement — Acta Orthop. 2012 Oct 22;83(5):536–42. doi: 10.3109/17453674.2012.733915 (PMC3488183; doi:10.3109/17453674.2012.733915), 2012-10-22
Supplement: ORT-1745-3674-083-536-s5277.pdf [file ORT-1745-3674-083-536-s5277.pdf]

## Supplementary article data

# Prognostic factors in lumbar spinal stenosis surgery

## A prospective study of imaging- and patient-related factors in 109 patients who were operated on by decompression

Freyr G Sigmundsson, Xiao P Kang, Bo Jönsson, and Björn Strömqvist

Department of Orthopedics, Clinical Sciences, Lund University, Skåne University Hospital, Lund, Sweden  
 Correspondence: freyr\_gauti.sigmundsson@med.lu.se  
 Submitted 11-12-05. Accepted 12-05-07

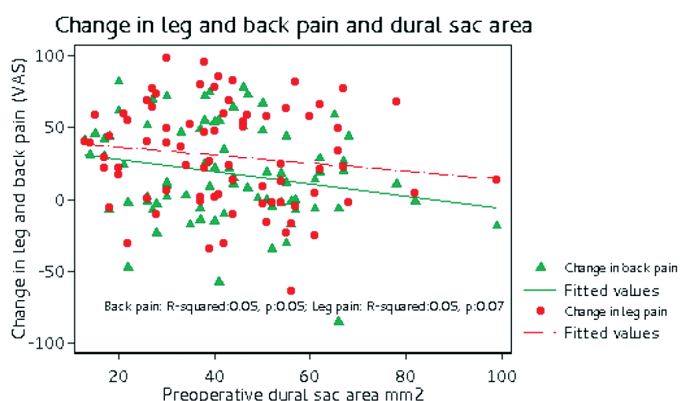

Negative value denotes increase in pain at 1 year follow up

Figure 1.

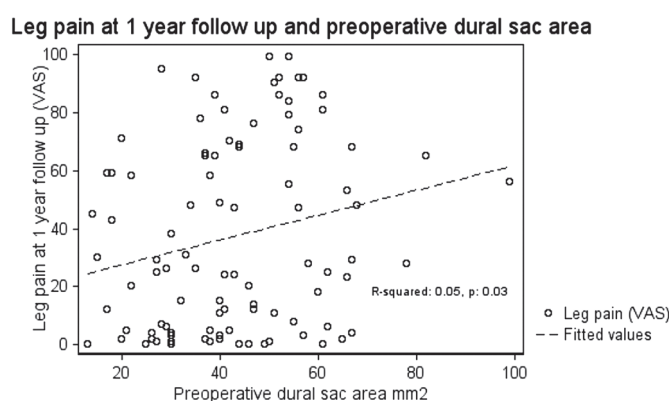

Figure 2.

Table 6. Preoperative duration of leg and back pain and global assessment at 1-year follow-up

|              | A  | B  | C   | D  | E  | F    | G |
|--------------|----|----|-----|----|----|------|---|
| Satisfied    | 43 | 24 | 0.2 | 36 | 27 | 0.1  |   |
| Undecided    | 14 | 11 | 0.8 | 12 | 13 | 0.7  |   |
| Dissatisfied | 4  | 7  | 0.1 | 3  | 8  | 0.09 |   |

Chi-square test.

- A Global assessment at 1- year follow-up
- B Duration of leg pain ≤ 2 years
- C Duration of leg pain > 2 years
- D p-value
- E Duration of back pain ≤ 2 years
- F Duration of back pain > 2 years
- G p-value

Table 7. Self-estimated preoperative walking distance and global assessment at 1-year follow-up

|              | A | B  | C  |
|--------------|---|----|----|
| Satisfied    |   | 26 | 39 |
| Undecided    |   | 15 | 9  |
| Dissatisfied |   | 5  | 5  |

Chi-square test; p-value = 0.2.

- A Global assessment at 1- year follow-up
- B Short preoperative walking distance (< 100 m)
- C Long preoperative walking distance (> 100 m)
